# Supplementary material for: Photoelectrical properties of graphene/doped GeSn vertical heterostructures
Source: Royal Society of Chemistry journal article supplement (doi:10.1039/d0ra04308g), 2020-01-01
Supplement: d0ra04308g1.pdf [file d0ra04308g1.pdf]

Supporting information

## **Photoelectrical properties of Graphene/ doped GeSn vertical heterostructures**

*Yanhui Lv<sup>1</sup>, Hui Li<sup>2</sup>, Cormac Ó Coileáin<sup>1</sup>, Duan Zhang<sup>3</sup>, Chenglin Heng<sup>1</sup>, Ching-Ray Chang<sup>4</sup>, K. -M. Hung<sup>5</sup>, Huang Hsiang Cheng<sup>2,\*</sup> and Han-Chun Wu<sup>1,\*</sup>*

<sup>1</sup>*School of Physics, Beijing Institute of Technology, Beijing 100081, P. R. China*

<sup>2</sup>*Center for Condensed Matter Sciences and Graduate Institute of Electronics Engineering, National Taiwan University, Taipei 106, Taiwan, ROC*

<sup>3</sup>*Elementary Educational College, Beijing key Laboratory for Nano-Photonics and Nano-Structure, Capital Normal University, Beijing 100048, P. R. China*

<sup>4</sup>*Department of Physics, National Taiwan University, Taiwan, ROC*

<sup>5</sup>*Department of Electronics Engineering, National Kaohsiung University of Science and Technology, Kaohsiung 807, Taiwan, ROC*

\* Address correspondence to: [wuhc@bit.edu.cn](mailto:wuhc@bit.edu.cn) (H.-C.W.); [hhcheng@ntu.edu.tw](mailto:hhcheng@ntu.edu.tw) (H.H.C.).

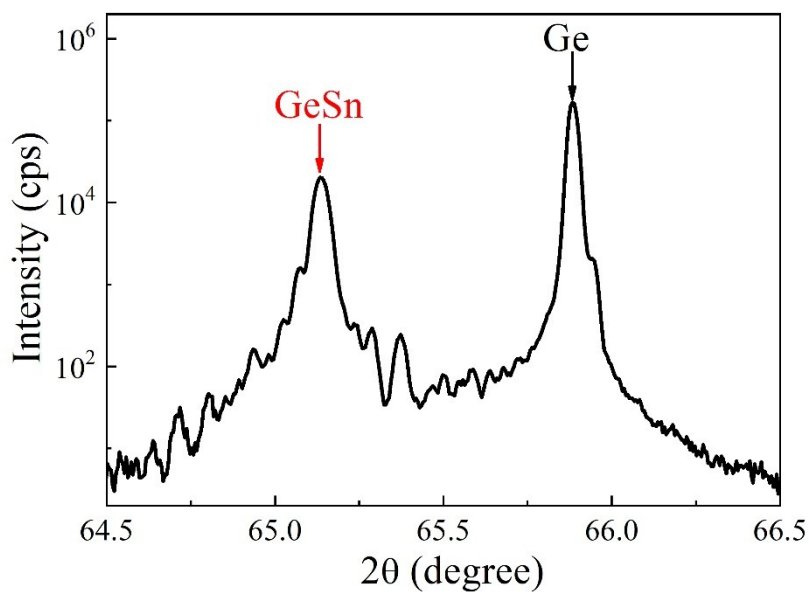

Figure S1.  $\omega$ - $2\theta$  scan of a 160 nm GeSn film grown on Ge substrate with (004) orientation.

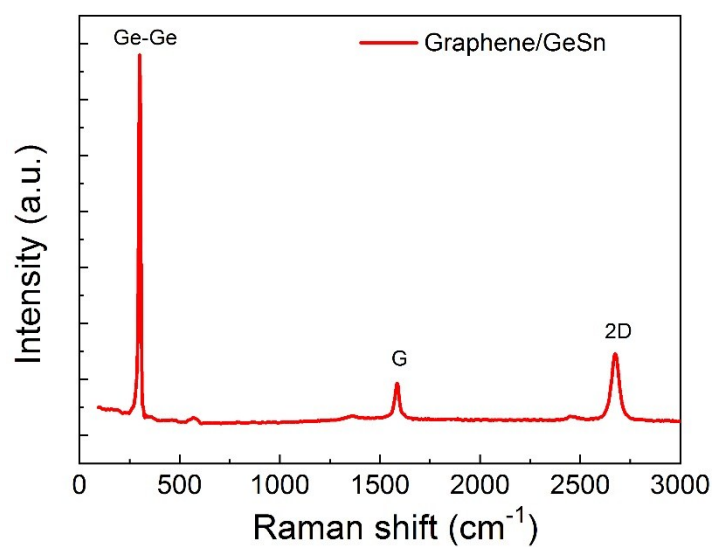

Figure S2. Typical Raman spectra of graphene transferred onto GeSn.

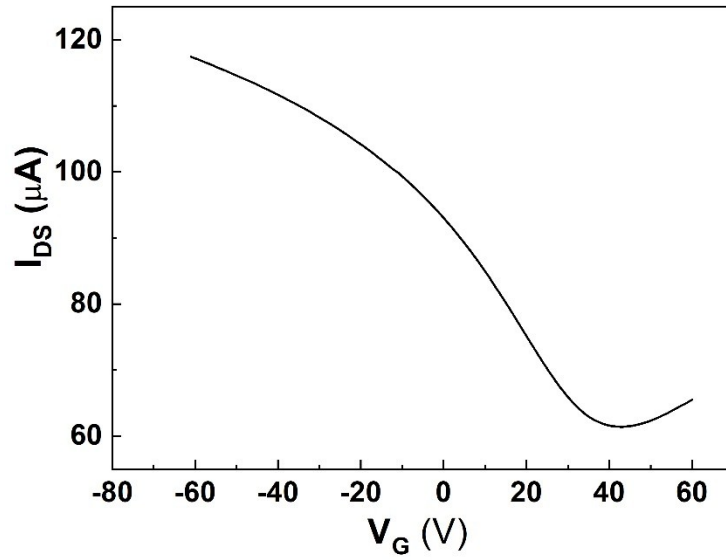

Figure S3. Transfer characteristic curve of graphene transferred onto Si substrate with 300 nm thick  $SiO_2$ , indicating that as grown graphene after transfer is in p-type. The bias voltage is 25 mV.

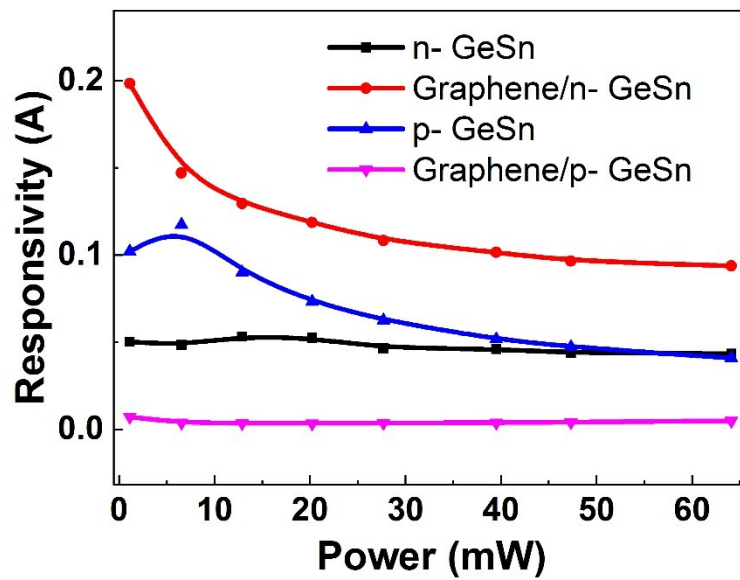

Figure S4. Responsivity as a function of incident power.

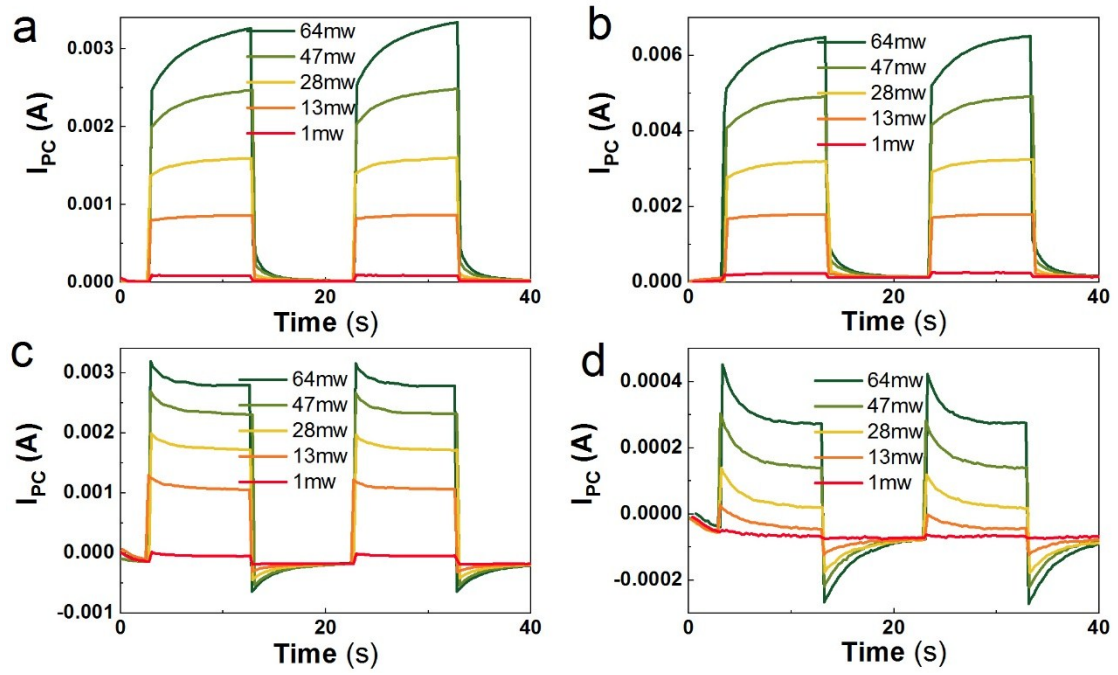

Figure S5. Time response of (a) n-type GeSn, (b) graphene/ n-type GeSn heterostructure, (c) p-type GeSn, and (d) graphene/ p-type GeSn heterostructure under different power density for the 1064 nm laser.

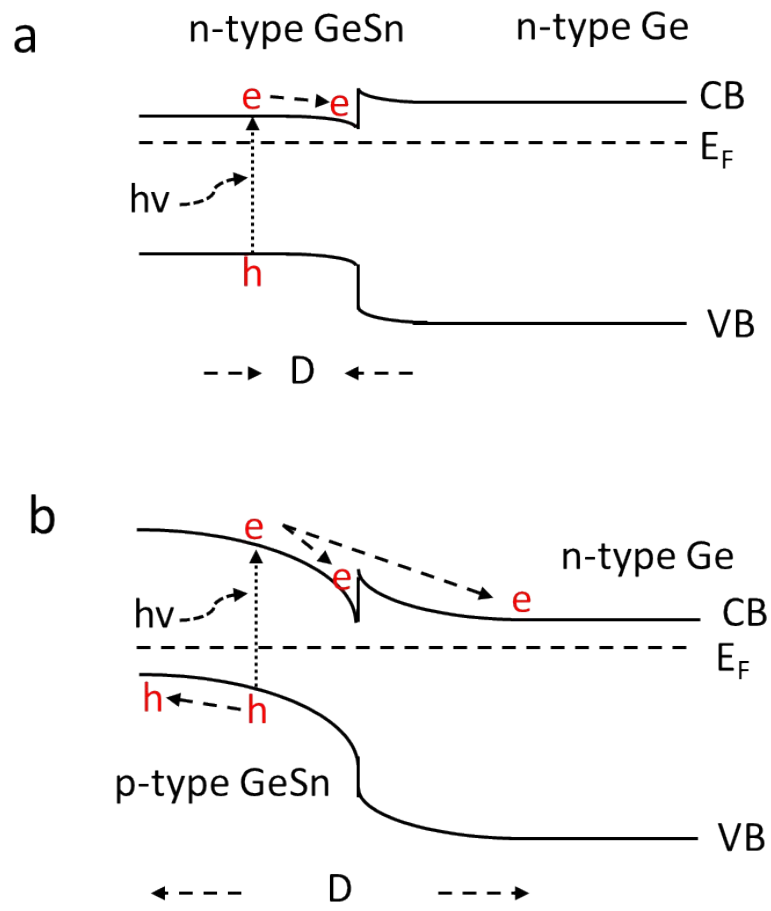

Figure S6. Schematic band profiles for (a) n-type GeSn/n-type Ge heterostructures and (b) p-type GeSn/n-type Ge heterostructures.

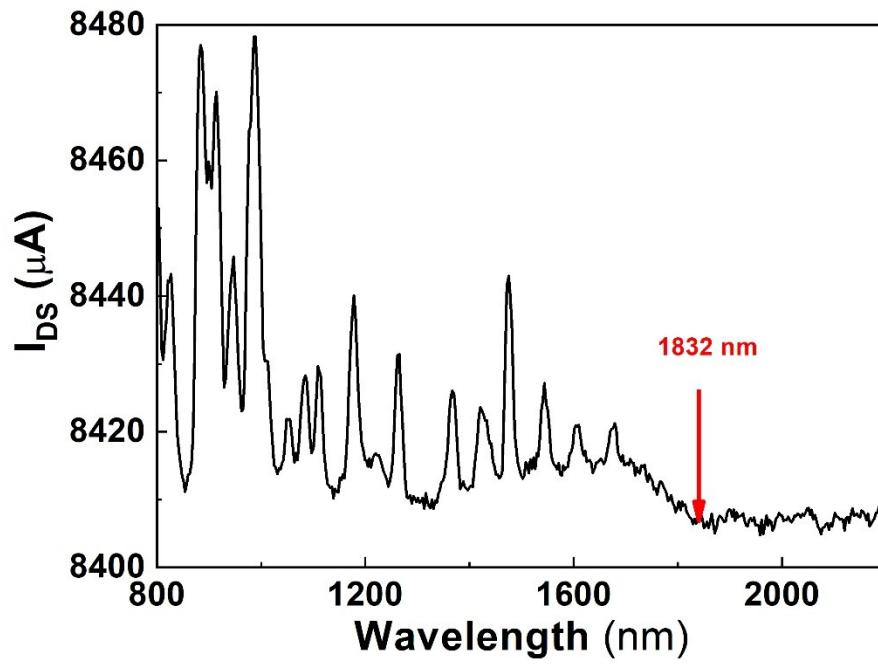

Figure S7.  $I_{DS}$  of graphene/n-type GeSn heterostructures measured using Omni- $\lambda$ 300i monochromator with a Zolix 150 W Xenon light source.

**Graphene/n-type GeSn for 785 nm laser.**

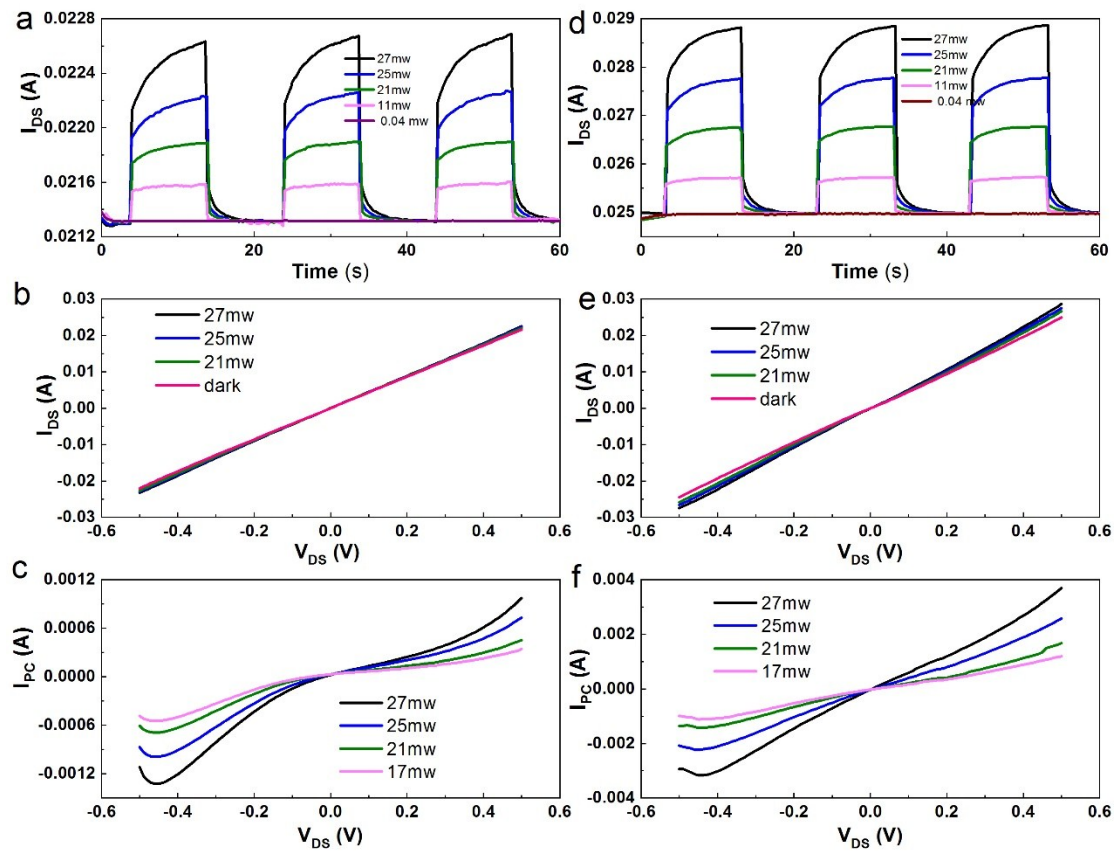

Figure S8. (a-c)  $I_{DS}$ - $t$  characteristics,  $I_{DS}$ - $V_{DS}$  characteristics, and  $I_{PC}$ - $V_{DS}$  characteristics of n-type GeSn under different power densities for 785 nm laser. (d-f)  $I_{DS}$ - $t$  characteristics,  $I_{DS}$ - $V_{DS}$  characteristics, and  $I_{PC}$ - $V_{DS}$  characteristics of Graphene/n-type GeSn under different power densities for the 785 nm laser.

**Graphene/p-type GeSn for 785 nm laser.**

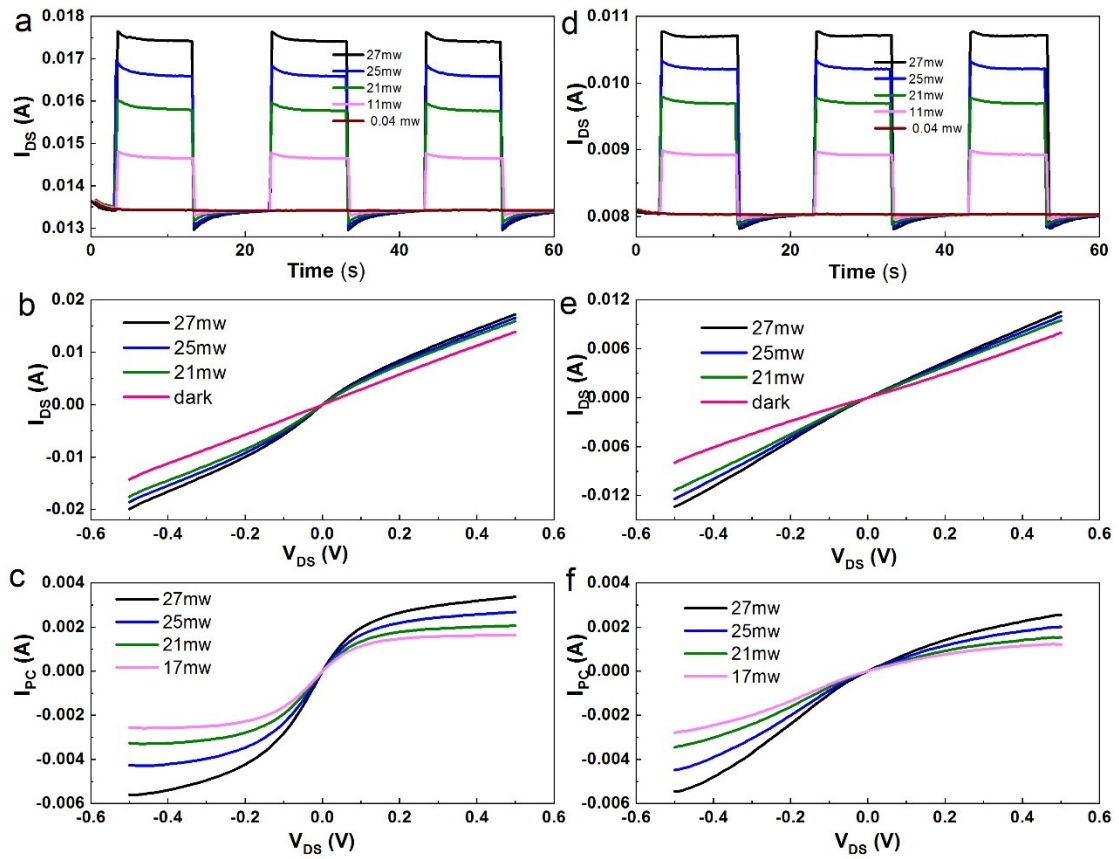

Figure S9. (a-c)  $I_{DS}$ - $t$  characteristics,  $I_{DS}$ - $V_{DS}$  characteristics, and  $I_{PC}$ - $V_{DS}$  characteristics of p-type GeSn under different power densities for 785 nm laser. (d-f)  $I_{DS}$ - $t$  characteristics,  $I_{DS}$ - $V_{DS}$  characteristics, and  $I_{PC}$ - $V_{DS}$  characteristics of Graphene/p-type GeSn under different power densities for the 785 nm laser.



**Graphene/n-type GeSn for 635 nm laser.**

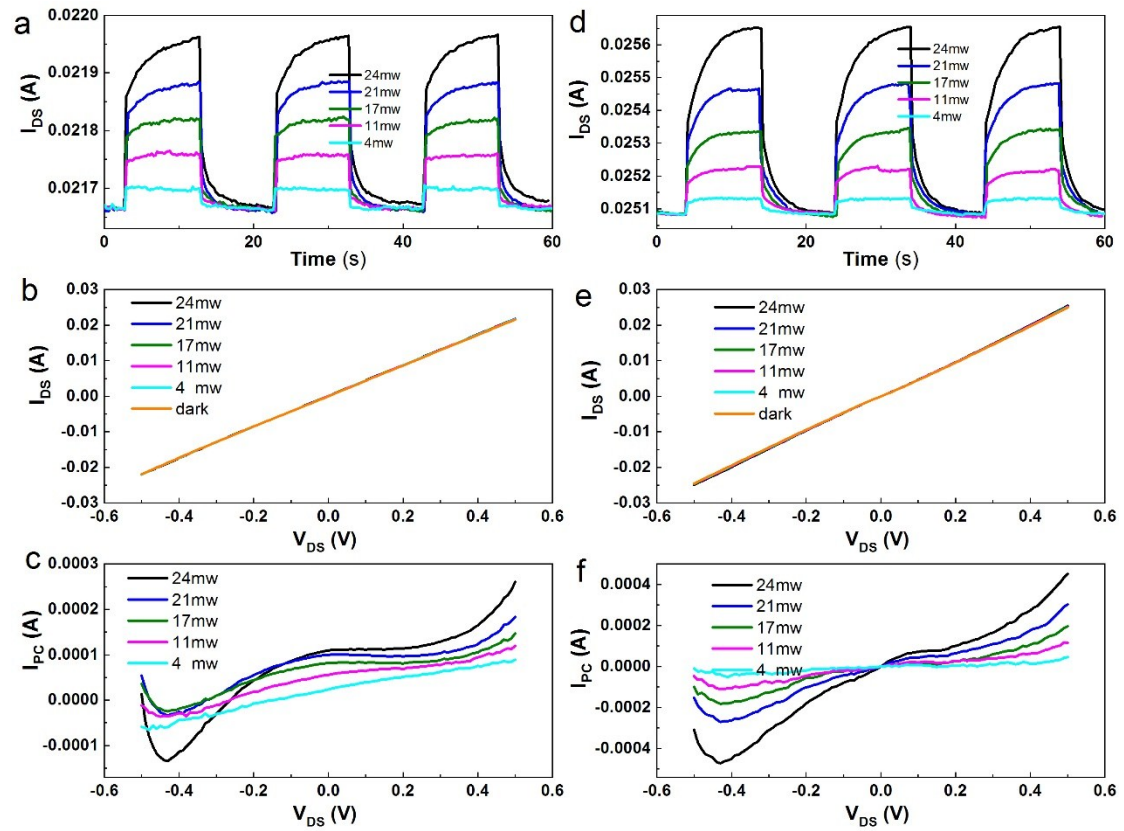

Figure S10. (a-c)  $I_{DS}$ - $t$  characteristics,  $I_{DS}$ - $V_{DS}$  characteristics, and  $I_{PC}$ - $V_{DS}$  characteristics of n-type GeSn under different power densities for 635 nm laser. (d-f)  $I_{DS}$ - $t$  characteristics,  $I_{DS}$ - $V_{DS}$  characteristics, and  $I_{PC}$ - $V_{DS}$  characteristics of Graphene/n-type GeSn under different power densities for the 635 nm laser.

**Graphene/p-type GeSn for 635 nm laser.**

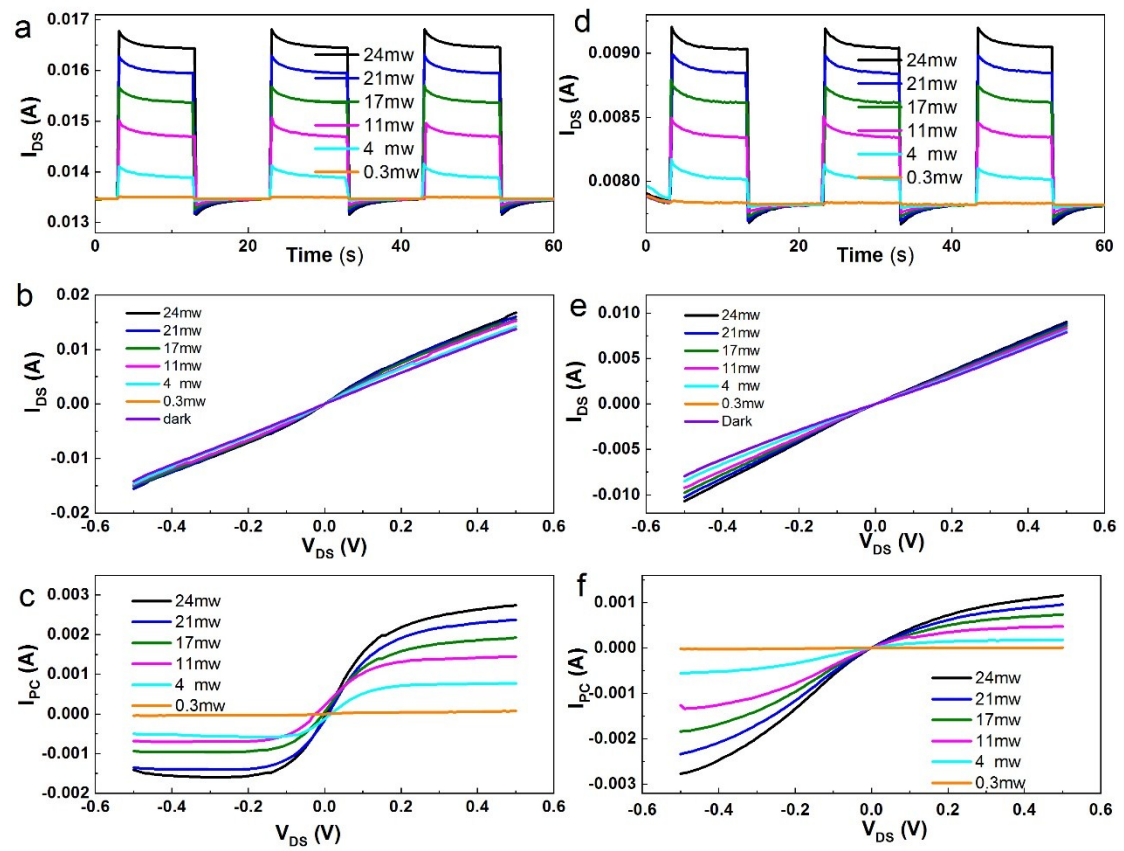

Figure S11. (a-c)  $I_{DS}$ - $t$  characteristics,  $I_{DS}$ - $V_{DS}$  characteristics, and  $I_{PC}$ - $V_{DS}$  characteristics of p-type GeSn under different power densities for 635 nm laser. (d-f)  $I_{DS}$ - $t$  characteristics,  $I_{DS}$ - $V_{DS}$  characteristics, and  $I_{PC}$ - $V_{DS}$  characteristics of Graphene/p-type GeSn under different power densities for the 635 nm laser.

**Graphene/n-type GeSn for 532 nm laser.**

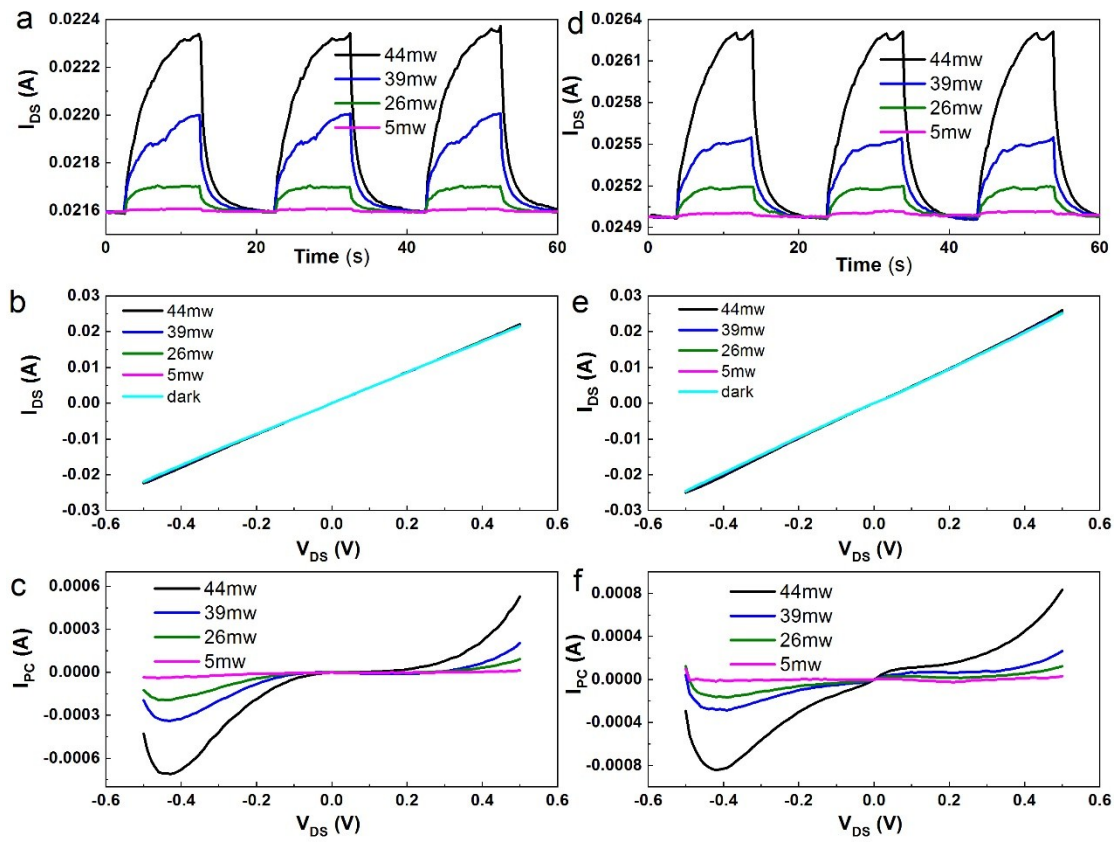

Figure S12. (a-c)  $I_{DS}$ - $t$  characteristics,  $I_{DS}$ - $V_{DS}$  characteristics, and  $I_{PC}$ - $V_{DS}$  characteristics of n-type GeSn under different power densities for 532 nm laser. (d-f)  $I_{DS}$ - $t$  characteristics,  $I_{DS}$ - $V_{DS}$  characteristics, and  $I_{PC}$ - $V_{DS}$  characteristics of Graphene/n-type GeSn under different power densities for the 532 nm laser.

**Graphene/p-type GeSn for 532 nm laser.**

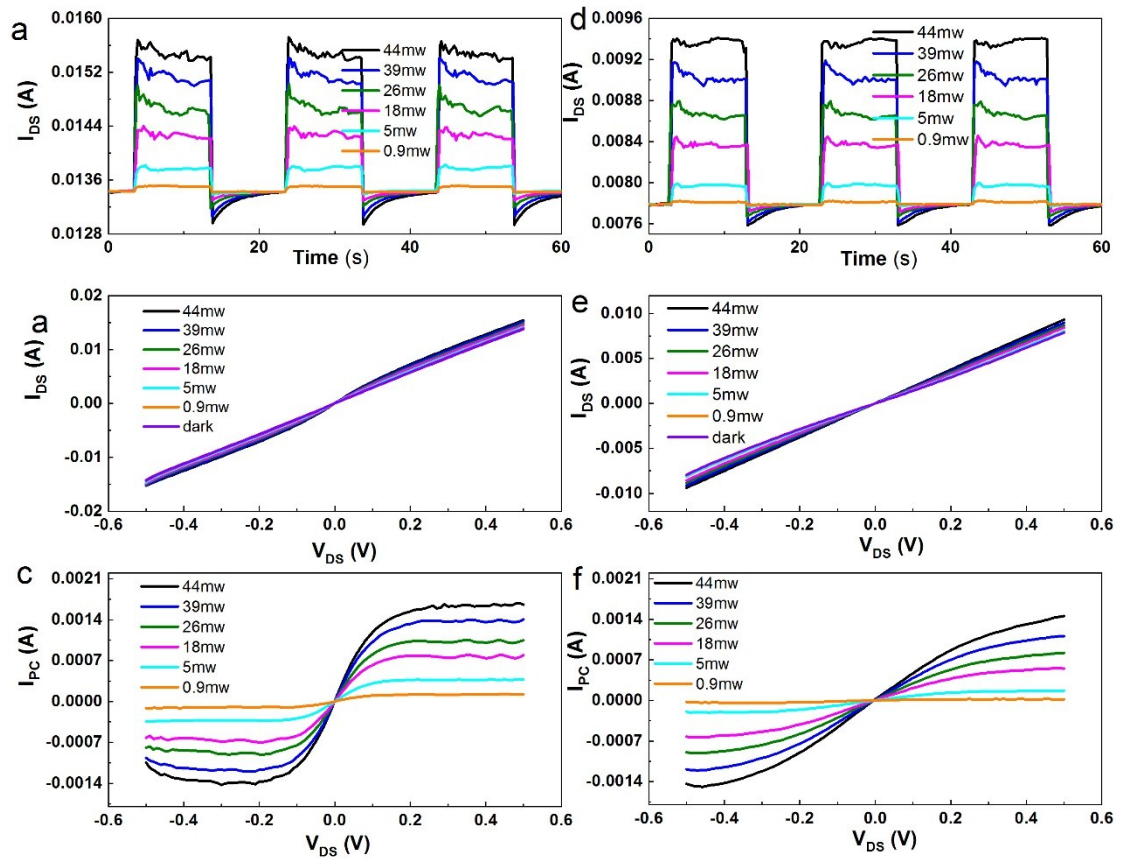

Figure S13. (a-c)  $I_{DS}$ - $t$  characteristics,  $I_{DS}$ - $V_{DS}$  characteristics, and  $I_{PC}$ - $V_{DS}$  characteristics of p-type GeSn under different power densities for 532 nm laser. (d-f)  $I_{DS}$ - $t$  characteristics,  $I_{DS}$ - $V_{DS}$  characteristics, and  $I_{PC}$ - $V_{DS}$  characteristics of Graphene/p-type GeSn under different power densities for the 532 nm laser.
